# Supplementary material for: A Role for the Budding Yeast Separase, Esp1, in Ty1 Element Retrotransposition
Source: PubMed Central journal article supplement (PMC4378997; doi:10.1371/journal.pgen.1005109), 2015-03-30

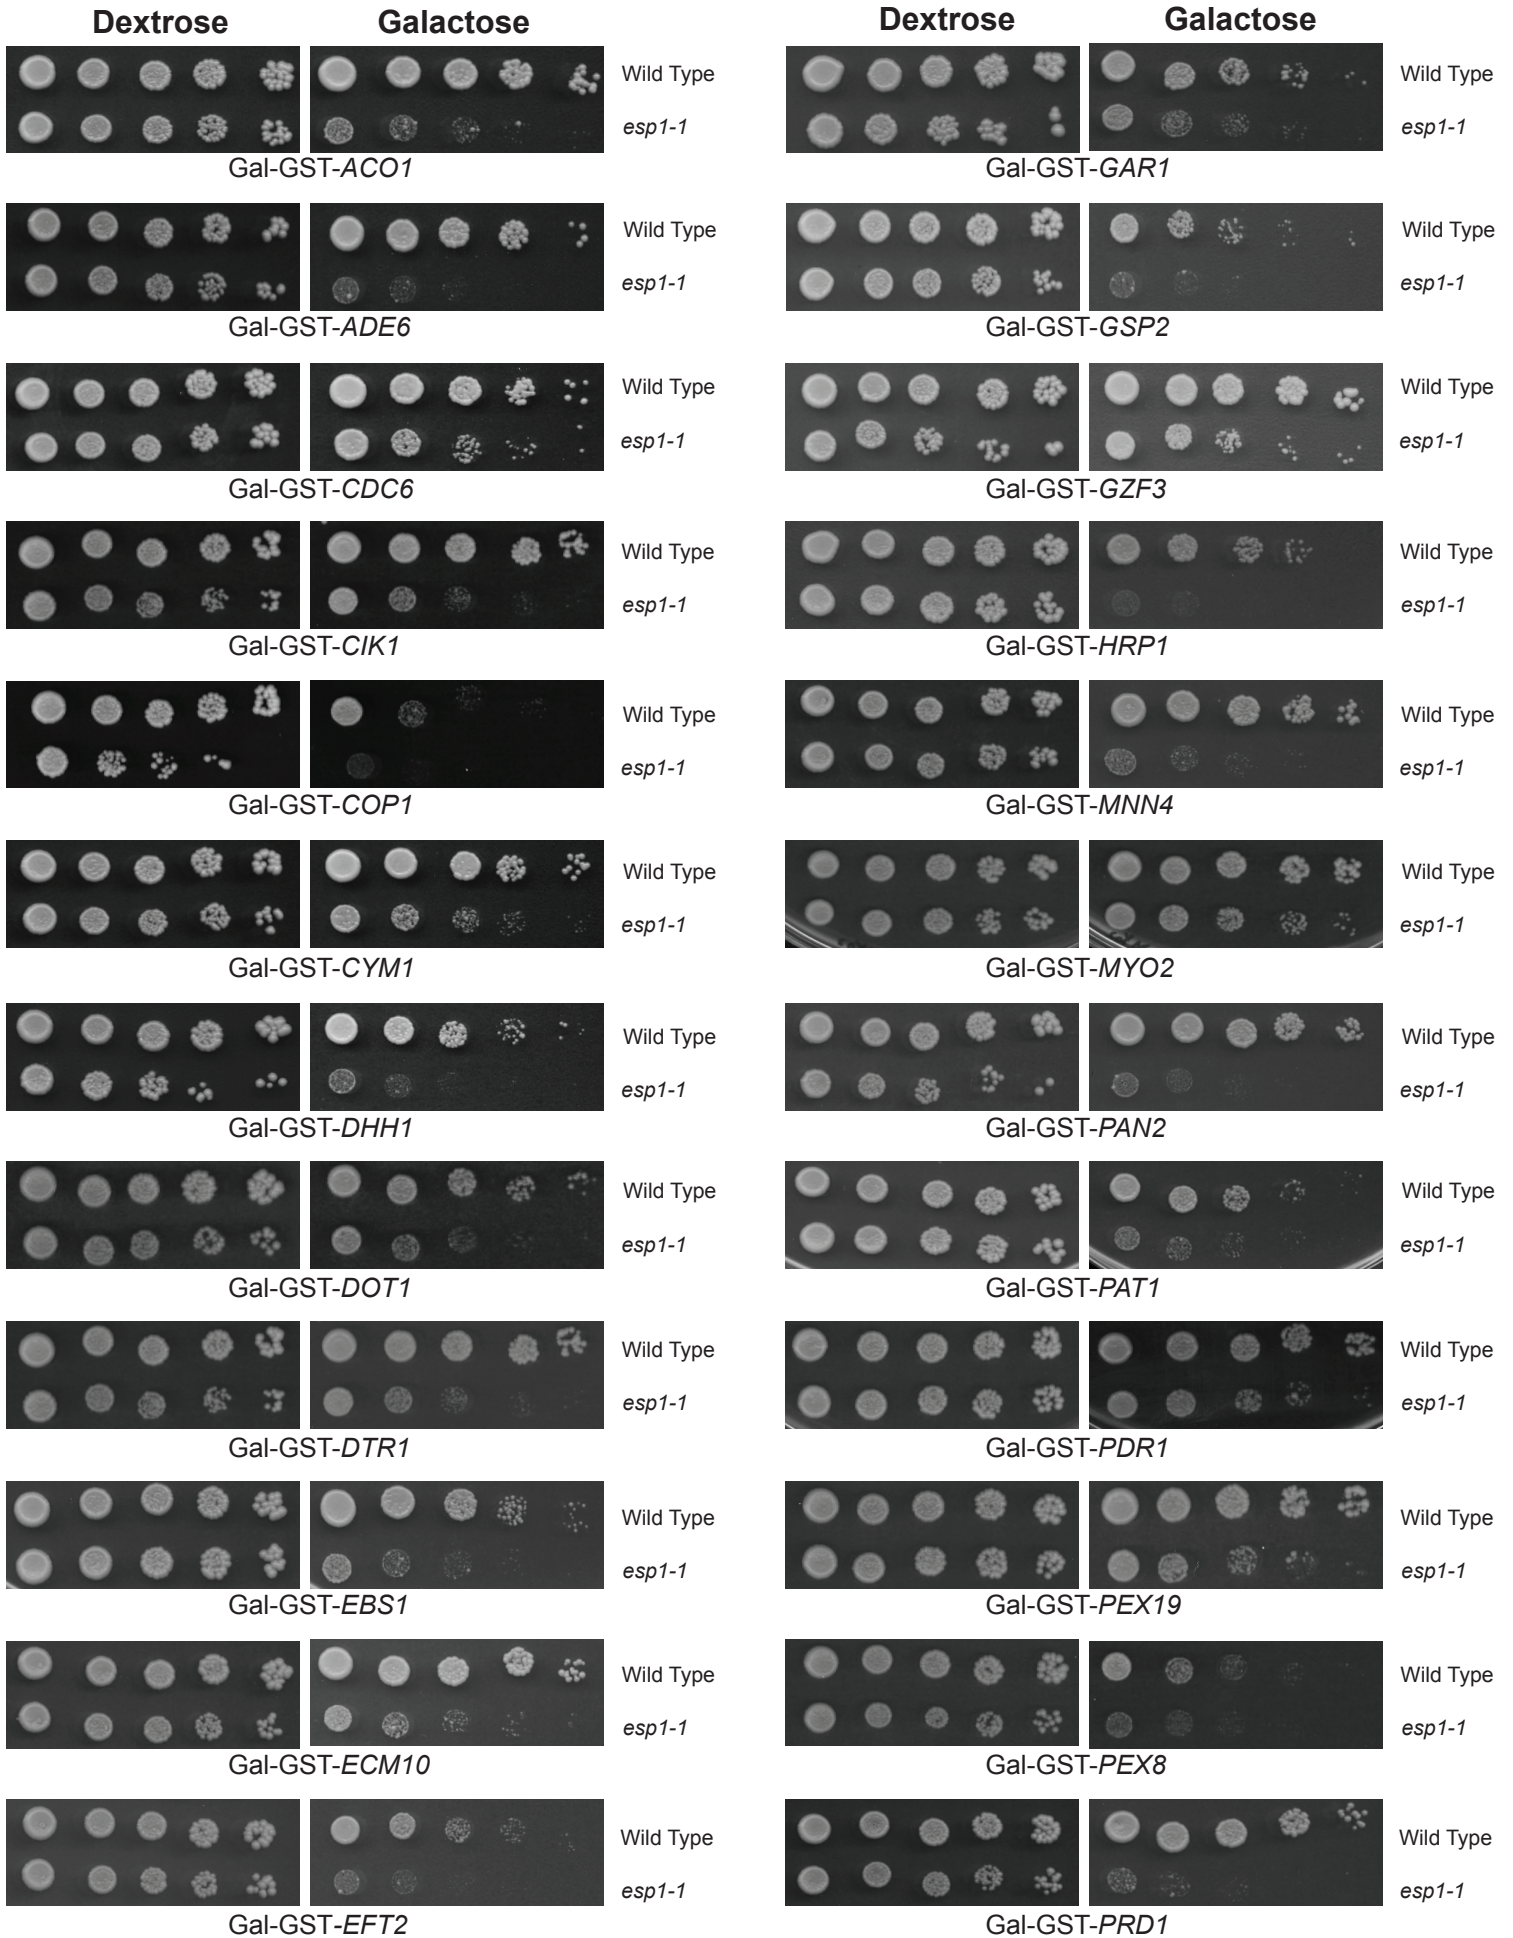

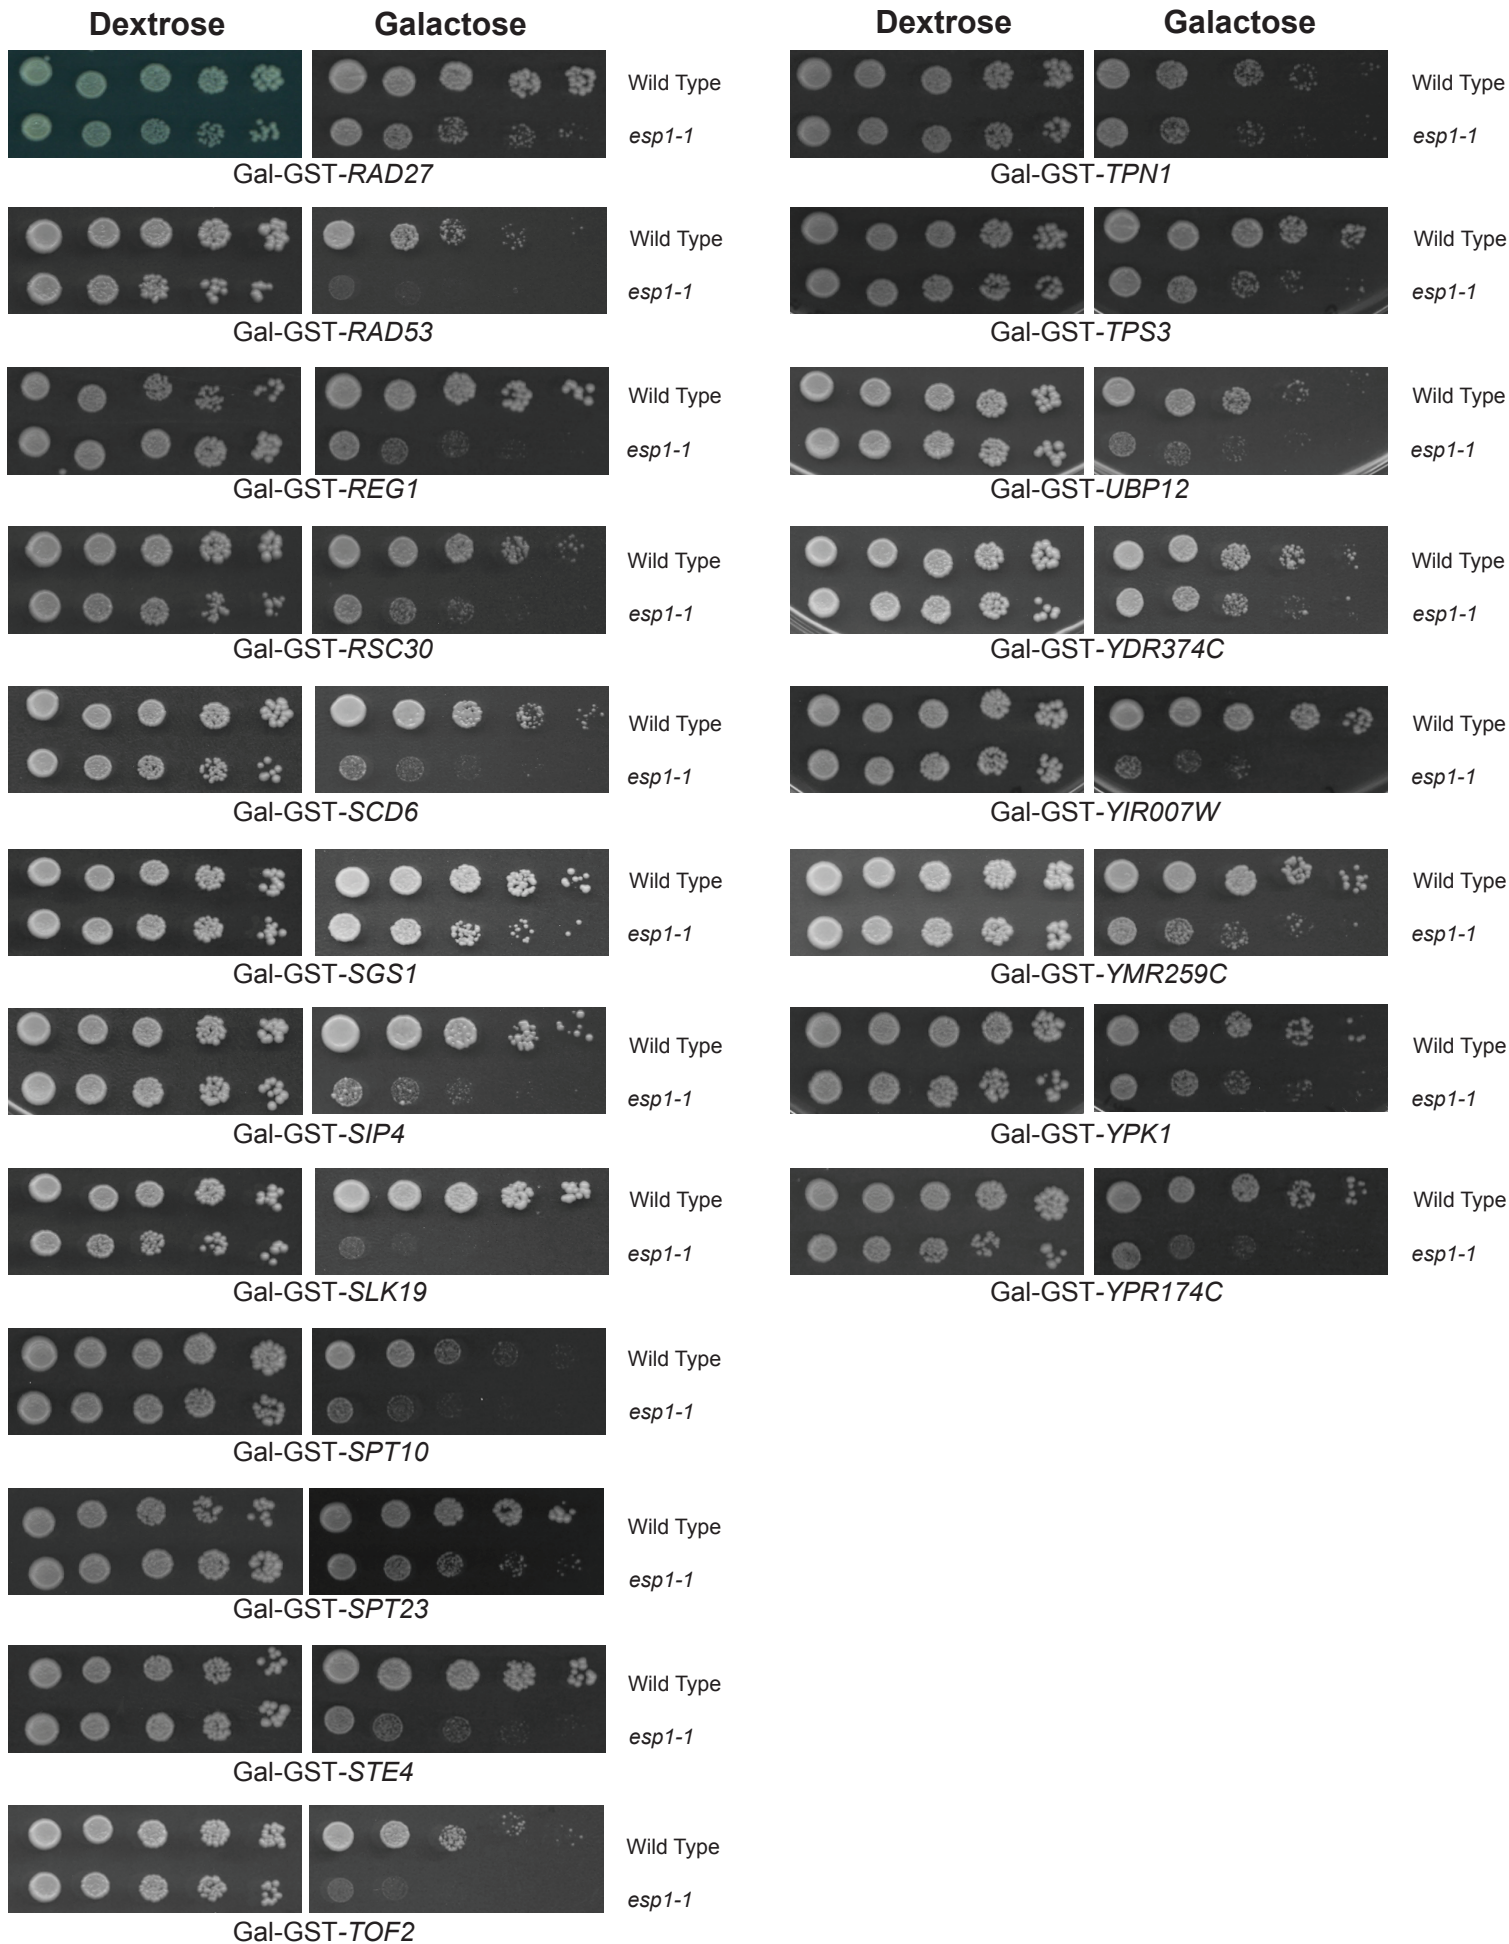

Supplement: pgen.1005109.s001.pdf [file pgen.1005109.s001.pdf]
